# Supplementary material for: Kinetic Study of Zirconia-Alumina-Supported Ni-Fe Catalyst for Dry Reforming of Methane: Impact of Partial Pressure and Reaction Temperature
Source: Hindawi journal article supplement (doi:10.1155/2023/8667432), 2023-05-11
Supplement: f1 [file 8667432.f1.docx]

**Kinetic study of zirconia-alumina supported Ni-Fe catalyst for dry reforming of methane: Impact of partial pressure and reaction temperature**

**Ahmed Al-Fatesh1*, Kenit Acharya2, Ahmed I. Osman3*, Ghzzai Almutairi4, Anis Hamza Fakeeha1**, **Ahmed Elhag Abasaeed1, Yousef A. Al-Baqmaa1**, **Rawesh Kumar2***

1Chemical Engineering Department, College of Engineering, King Saud University, P.O. Box 800, Riyadh 11421, Saudi Arabia

2 Department of Chemistry, Indus University, Ahmedabad, Gujarat, India, 382115

3 School of Chemistry and Chemical Engineering, Queen’s University Belfast, Belfast BT9 5AG, Northern Ireland, UK

4Water and Energy Research Institute, King Abdulaziz City for Science and Technology (KACST)

*Correspondence: [aalfatesh@ksu.edu.sa](mailto:aalfatesh@ksu.edu.sa) (A.S.A.-F.), [kr.rawesh@gmail.com](mailto:kr.rawesh@gmail.com) (R.K), [Gmotari@kacst.edu.sa](mailto:Gmotari@kacst.edu.sa) (G.A) [aosmanahmed01@qub.ac.uk](mailto:aosmanahmed01@qub.ac.uk) (A.I.O).

**Supplementary information**

**Supporting information S1.** Flow rate of a gas is converted from ml/min to mol/hour. Then expression for mole fraction, partial pressure and specific feed rate of each gas are shown below:

1. Mole fraction of a gas =
2. Partial pressure of a gas = Mole fraction of a gas x Total pressure

Here, total pressure is 101.325 kPa.

1. Specific feed rate of each gas =

**Supporting Information S2.** The detail eexpressions for rate of H2 formation and rate of CO formation from CO2 conversion and CH4 conversion data are shown below:

DRM reaction and reverse water gas shift reaction are main competing reactions as shown below:


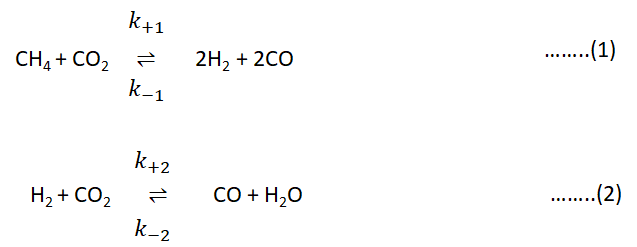


and are rate constant for forward reaction and rate constant for reverse reaction in equation (1) respectively. and are rate of forward reaction and rate of reverse reaction in equation (1) respectively. and for equation (1) can be written as:

; ; Rate of DRM () =

and are rate constant for forward reaction and rate constant for reverse reaction in equation (2). and are rate of forward reaction and rate of reverse reaction in equation (2) respectively. and for equation (2) can be written as:

; ; Rate of RWGS () =

Now,

Rate of CH4 formation;

In the same way,

Rate of CO2 formation;

After putting the value of rate of DRM () in above equation,

Rate of H2 formation = 2 2 ( () =

Rate of CO formation = 2 2 ( () = ()

Rate of H2O formation = =


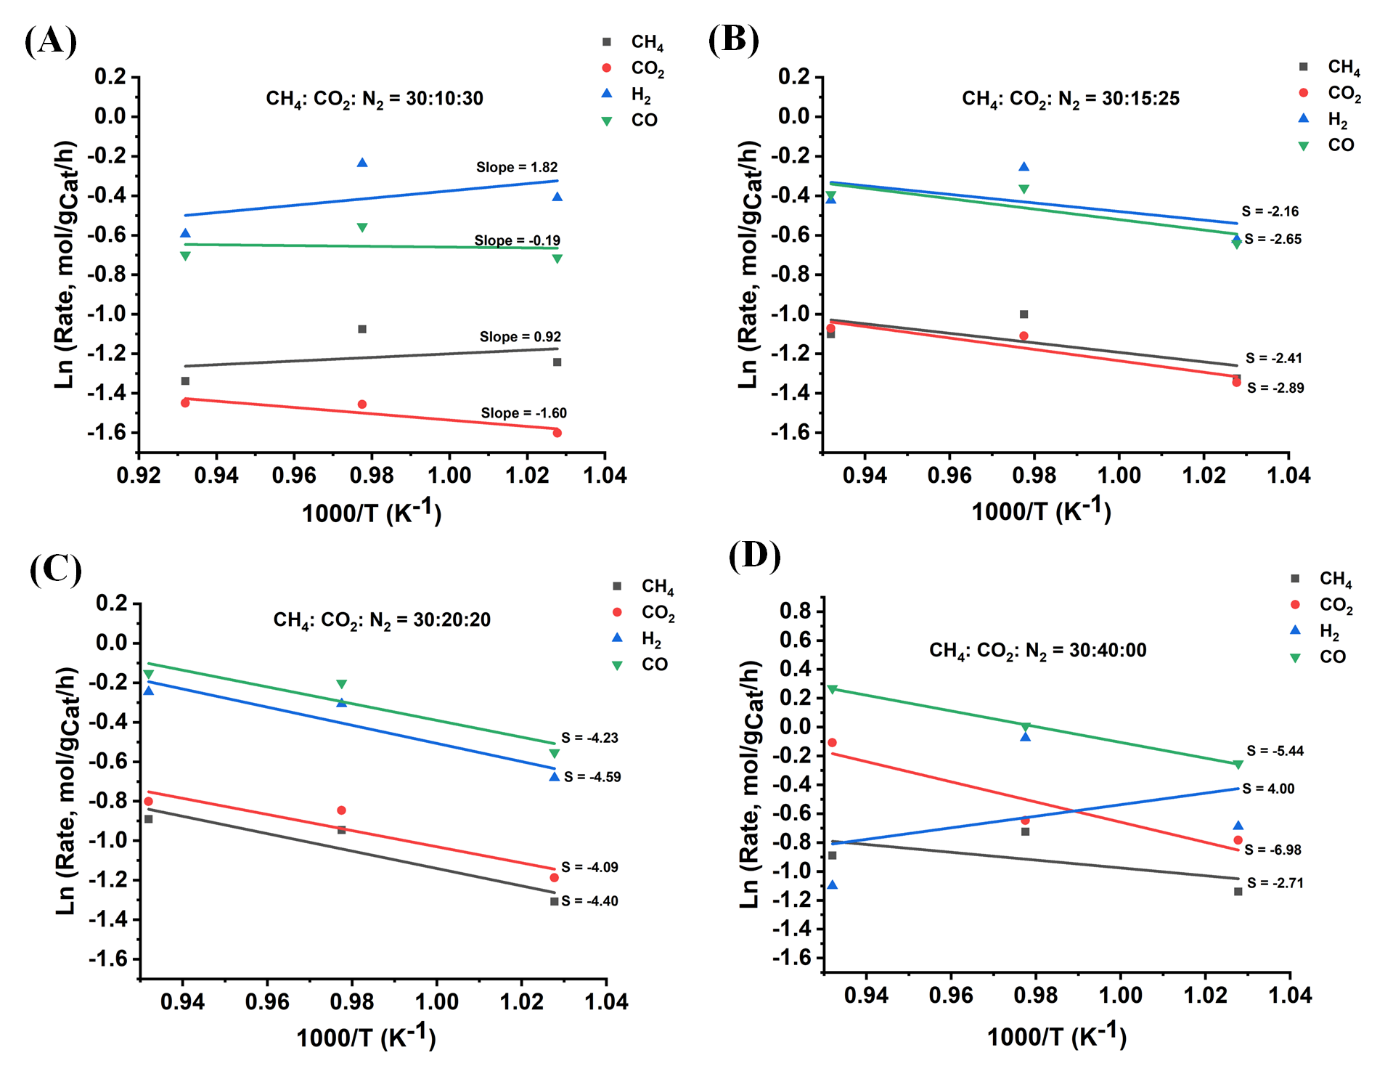


**Fig. S3.** Influence of the reaction temperature on the CH4 consumption rate, CO2 consumption rate, H2 formation rate and CO formation rate upon fixing CH4 flow rate (A) CH4 : CO2 : N2 = 30 :10 :30 (B) CH4 : CO2 : N2 = 30 :15 : 25 (C) CH4 : CO2 : N2 = 30 :20 :20 (D) CH4 : CO2 : N2 = 30 :40 : 00

**Supporting Information S4**: Calculation of Mass transfer limitation:

The absence of external mass transfer limitations was checked [4] by the Mears criterion, – rA’ρbR n / (kcCAb) < 0.15, where **–rA’** is the measured reaction rate in **kmolkgcat−1 s −1**, **ρb** is the bulk density of catalyst bed in kg m−3, **R** is the catalyst particle radius in meter, **n** is the reaction order, kc is the mass transfer coefficient in **m s −1** and **CAb** is the bulk gas concentration of A in kmol m −3. In the present work, CH4 conversion rate (–**) and CO2 conversion rate** (–**)**, is in**kmolkgcat−1 s −1,** average solid catalyst density (**ρc)** is 4000 **kgm−3**, average density of catalyst (ρb) is 2000 **kg m−3** (**ρb=(1−ϕb)ρc)**, bed porosity (**ϕb)** is taken as 0.38, average radius (R) is 7.50 x 10-5 m, order of reaction (n) is 2 and **CAb, is** bulk gas average concentration (in **kmol m−3)** over 5Ni2Fe/ZrAl catalyst. A conservative estimate of mass transfer coefficient (kc), is estimated by using Dwivedi and Upadhyay correlation which are typically encountered in laboratory reactors such as the one used in the present study. The absence of internal mass transfer limitations was ascertained by means of the Weisz–Prater criterion, CWP = −rA**ρ**cR 2 /(DeCAs) < 1). In this criterion, the Gas concentration of a at catalyst surface CAs is assumed equal to CAb (CAs= CAb) and effective diffisibility De is taken as = DAB. ϕp.σc/τ where DAB is Molecular diffusion of Bz and N2, ϕp is pellet porosity, σc is constriction factor and τ is tortuosity. ϕp, σcand τ have values 0.38, 0.8 and 3 respectively. These numbers resulted in a value for the Weisz–Prater criterion of < 1. The Mears criterion and Weisz-Prater criterion values for 5Ni2Fe/ZrAl catalyst was mentioned in the Table below for external and internal mass transfer respectively. The absence of both external and internal mass transfer limitation is found for all catalytic system used in present case.

**External and Internal Mass Transfer Limitation**

| **CH4 flow rate**  **(ml/min)** | **CO2 flow rate**  **(ml/min)** | **N2**  **flow**  **rate**  **(ml/min)** | **Temp.**  **(oC)** | **Ex. Diff.**  **w.r.t**  **CH4**  **(x10-3)** | **Ex. Diff.**  **w.r.t**  **CO2**  **(x10-3)** | **Int. Diff.**  **w.r.t**  **CH4**  **(x10-3)** | **Int. Diff.**  **w.r.t**  **CO2**  **(x10-3)** |
| --- | --- | --- | --- | --- | --- | --- | --- |
| **10** | **30** | **30** | 700 | 3.15 | 1.36 | 6.02 | 2.60 |
| **10** | **30** | **30** | 750 | 1.70 | 0.622 | 7.12 | 2.61 |
| 10 | 30 | 30 | 800 | 1.41 | 0.625 | 6.89 | 3.06 |
| **15** | **30** | **25** | 700 | 2.29 | 1.47 | 5.25 | 3.37 |
| **15** | **30** | **25** | 750 | 1.64 | 0.935 | 7.00 | 4.00 |
| 15 | 30 | 25 | 800 | 1.38 | 0.846 | 6.87 | 4.20 |
| **20** | **30** | **20** | 700 | 1.64 | 1.42 | 4.20 | 3.64 |
| **20** | **30** | **20** | 750 | 1.49 | 1.15 | 6.51 | 5.02 |
| 20 | 30 | 20 | 800 | 1.32 | 1.04 | 6.66 | 5.22 |
| **40** | **30** | **0** | 700 | 1.17 | 1.63 | 3.24 | 4.54 |
| **40** | **30** | **0** | 750 | 0.999 | 1.43 | 4.44 | 6.35 |
| 40 | 30 | 0 | 800 | 1.08 | 1.24 | 5.51 | 6.33 |
| **35** | **35** | **0** | 700 | 1.13 | 1.33 | 3.34 | 3.95 |
| **35** | **35** | **0** | 750 | 1.07 | 1.19 | 4.86 | 5.40 |
| 35 | 35 | 0 | 800 | 0.969 | 1.20 | 5.01 | 6.22 |
| **30** | **10** | **30** | 700 | 0.936 | 1.96 | 2.95 | 6.19 |
| **30** | **10** | **30** | 750 | 0.908 | 1.86 | 3.36 | 6.89 |
| 30 | 10 | 30 | 800 | 0.550 | 1.47 | 2.49 | 6.69 |
| **30** | **15** | **25** | 700 | 0.824 | 1.62 | 2.72 | 5.33 |
| **30** | **15** | **25** | 750 | 0.952 | 1.71 | 3.62 | 6.49 |
| 30 | 15 | 25 | 800 | 0.685 | 1.41 | 3.16 | 6.51 |
| **30** | **20** | **20** | 700 | 0.805 | 1.36 | 2.77 | 4.68 |
| **30** | **20** | **20** | 750 | 0.980 | 1.62 | 3.82 | 6.34 |
| 30 | 20 | 20 | 800 | 0.832 | 1.37 | 3.90 | 6.40 |
| **30** | **40** | **0** | 700 | 0.919 | 0.985 | 3.27 | 3.50 |
| **30** | **40** | **0** | 750 | 1.19 | 0.967 | 4.77 | 3.87 |
| 30 | 40 | 0 | 800 | 0.817 | 1.34 | 3.90 | 6.40 |

**Temp.** = Temperature, **Ex. Diff. w.r.t =** External Diffusion with respect to**, Int. Diff. w.r.t =** Internal Diffusion with respect to.
